# Supplementary material for: Root fragment weight and carbohydrate dynamics of two weedy thistles Cirsium arvense (L.) Scop. and Sonchus arvensis L. during sprouting
Source: PeerJ. 2025 Apr 4;13:e19155. doi: 10.7717/peerj.19155 (PMC11974545; doi:10.7717/peerj.19155)
Supplement: Supplemental Information 1 [file peerj-13-19155-s001.xlsx]

## Sheet: Boni_Comp_point
Year	Species	Root.Size	Assessment	Group	Number	leaves	Bground(FM)	Bground(TM)	Aground(FM)	Aground(TM)	DAE	DTE	GDDAE	GDD
2020	Sonchus	Large	1	SL1	9	0	0.55	0.04	0.7	0.11	6	19	0	200
2020	Sonchus	Large	1	SL1	29	0	0.67	0.04	0.7	0.06	1	19	0	200
2020	Sonchus	Large	1	SL1	139	0	0.73	0.05	0	0	NA	NA	NA	200
2020	Sonchus	Large	1	SL1	158	0	0.77	0.11	0.8	0.04	1	14	64.7	200
2020	Sonchus	Large	1	SL1	262	3	1.24	0.07	1.53	0.13	0	19	0	200
2020	Sonchus	Large	2	SL2	2	2	1.11	0.05	1.45	0.17	8	20	270.862	300
2020	Sonchus	Large	2	SL2	44	1	0.23	0.01	1.33	0.13	7	21	72.1125	300
2020	Sonchus	Large	2	SL2	137	5	1.58	0.12	1.94	0.17	13	15	145.887	300
2020	Sonchus	Large	2	SL2	193	4	1.69	0.15	1.99	0.18	8	20	83.6	300
2020	Sonchus	Large	2	SL2	235	1	1.79	0.09	1.68	0.15	0	28	0	300
2020	Sonchus	Large	3	SL3	63	5	1.83	0.15	3.47	0.38	11	26	115.037	400
2020	Sonchus	Large	3	SL3	72	3	1.37	0.11	2.11	0.2	7	30	74.0375	400
2020	Sonchus	Large	3	SL3	103	3	2.15	0.28	2.95	0.26	15	22	155.025	400
2020	Sonchus	Large	3	SL3	194	2	1.42	0.09	1.87	0.136	12	25	124.675	400
2020	Sonchus	Large	3	SL3	222	4	0.62	0.06	2.48	0.22	19	18	202.012	400
2020	Sonchus	Large	4	SL4	287	8	3.52	0.26	18.32	0.23	28	17	309.775	500
2020	Sonchus	Large	4	SL4	71	7	2.99	0.17	16.74	0.19	27	18	298.025	500
2020	Sonchus	Large	4	SL4	8	8	5.86	0.46	24.74	0.57	25	20	275	500
2020	Sonchus	Large	4	SL4	192	6	6.83	0.58	19.62	0.34	27	18	298.025	500
2020	Sonchus	Large	4	SL4	123	7	4.28	0.39	16.08	0.17	26	19	285.975	500
2020	Sonchus	Large	5	SL5	1	19	5.58	0.65	27.4	2.47	37	15	432.4	600
2020	Sonchus	Large	5	SL5	76	11	4.94	0.53	36.7	3.83	37	15	432.4	600
2020	Sonchus	Large	5	SL5	174	17	6.84	0.66	39.5	3.95	34	18	393.137	600
2020	Sonchus	Large	5	SL5	284	8	5.32	0.46	45.7	5.28	37	15	432.4	600
2020	Sonchus	Large	5	SL5	69	26	7.42	0.82	70.2	7	31	21	358.625	600
2020	Sonchus	Large	6	SL6	153	27	7.6	0.72	90.4	9.81	45	14	544.362	700
2020	Sonchus	Large	6	SL6	227	28	11.5	1.19	211.7	24.53	42	17	503.462	700
2020	Sonchus	Large	6	SL6	21	37	12.4	1.17	136.7	15.2	42	17	503.462	700
2020	Sonchus	Large	6	SL6	106	41	12.7	1.49	114.8	11.72	40	19	479.662	700
2020	Sonchus	Large	6	SL6	6	25	8.4	0.9	109.3	10.57	38	21	457.2	700
2020	Sonchus	Large	7	SL7	15	54	10.5	1.03	174.4	19.95	50	16	625.837	800
2020	Sonchus	Large	7	SL7	126	34	9.5	0.95	105.8	14.18	47	19	588.013	800
2020	Sonchus	Large	7	SL7	206	26	5.7	0.46	125.8	12.11	51	15	639.325	800
2020	Sonchus	Large	7	SL7	230	86	9.3	1.06	149.3	17.92	47	19	588.013	800
2020	Sonchus	Large	7	SL7	37	24	3.6	0.56	74.7	6.89	46	20	577.037	800
2020	Sonchus	Large	8	SL8	22	50	11.8	1.04	111.7	9.96	43	30	590.375	900
2020	Sonchus	Large	8	SL8	226	31	12.8	1.07	153.8	15.22	58	15	757.613	900
2020	Sonchus	Large	8	SL8	171	40	13.8	1.21	196.2	16.06	53	20	695.325	900
2020	Sonchus	Large	8	SL8	121	105	9.9	1.04	232.5	27.91	52	21	683.838	900
2020	Sonchus	Large	8	SL8	59	51	12.5	1.42	156.2	18.55	56	17	730.1	900
2020	Sonchus	Large	9	SL9	75	32	18.5	1.76	143.7	18.23	63	15	849.988	1000
2020	Sonchus	Large	9	SL9	151	48	16.3	1.67	354	32.41	61	17	822.475	1000
2020	Sonchus	Large	9	SL9	11	72	15.9	1.53	239.4	28.63	61	17	822.475	1000
2020	Sonchus	Large	9	SL9	234	42	9.6	1.12	167.2	14.37	62	17	836.5	1000
2020	Sonchus	Large	9	SL9	30	74	26.2	2.49	243.7	20.65	60	18	810.725	1000
2020	Sonchus	Large	10	SL10	221	93	11.7	1.08	396.9	37.72	65	18	909.287	1100
2020	Sonchus	Large	10	SL10	35	45	13.8	1.26	166	16.08	64	19	897.237	1100
2020	Sonchus	Large	10	SL10	186	66	22.7	3.44	402.6	62.61	64	19	897.237	1100
2020	Sonchus	Large	10	SL10	283	104	27.3	2.92	524.6	43.97	67	17	921.037	1100
2020	Sonchus	Large	10	SL10	212	24	15.6	1.79	204.9	21.21	49	34	740.575	1100
2020	Sonchus	Large	11	SL11	28	32	16.6	1.7	327.2	27.65	63	20	987.437	1200
2020	Sonchus	Large	11	SL11	42	27	30.9	2.62	339.5	27.8	61	22	963.475	1200
2020	Sonchus	Large	11	SL11	122	42	23.1	1.16	364.8	32.83	63	20	987.437	1200
2020	Sonchus	Large	11	SL11	231	86	30.4	3.65	427.2	30.88	62	21	975.95	1200
2020	Sonchus	Large	11	SL11	160	30	16.9	1.62	299.5	35.95	46	37	808.45	1200
2020	Sonchus	Large	12	SL12	73	40	14.4	1.34	397.9	31.25	75	18	1112.79	1300
2020	Sonchus	Large	12	SL12	150	37	44.8	3.77	392.5	33.46	77	17	1124.54	1300
2020	Sonchus	Large	12	SL12	10	22	36.5	3.08	499.1	42.15	73	20	1089.76	1300
2020	Sonchus	Large	12	SL12	252	65	23.2	2.3	370.2	38.44	72	21	1078.27	1300
2020	Sonchus	Large	12	SL12	109	20	13.3	1.69	304.9	33.91	72	21	1078.27	1300
2020	Sonchus	Small	1	SS1	7	0	0.42	0.01	0	0	1	18	12.05	200
2020	Sonchus	Small	1	SS1	81	0	0	0	0	0	NA	NA	NA	200
2020	Sonchus	Small	1	SS1	124	0	0	0	0	0	NA	NA	NA	200
2020	Sonchus	Small	1	SS1	157	0	0	0	0	0	NA	NA	NA	200
2020	Sonchus	Small	1	SS1	271	0	0.51	0.07	0	0	0	19	0	200
2020	Sonchus	Small	2	SS2	65	1	0.64	0.1	1.45	0.11	7	21	72.1125	300
2020	Sonchus	Small	2	SS2	82	0	0.15	0.02	0	0	8	20	83.6	300
2020	Sonchus	Small	2	SS2	88	0	0.57	0.1	0	0	7	21	72.1125	300
2020	Sonchus	Small	2	SS2	190	1	0.62	0.07	1.99	0.187	1	27	10.3	300
2020	Sonchus	Small	2	SS2	266	0	0.77	0.09	0	0	NA	NA	NA	300
2020	Sonchus	Small	3	SS3	40	1	0.51	0.12	0.54	0.08	18	19	189.962	400
2020	Sonchus	Small	3	SS3	74	3	0.74	0.095	0.98	0.04	7	30	74.0375	400
2020	Sonchus	Small	3	SS3	133	5	1.39	0.153	1.76	0.16	11	26	115.037	400
2020	Sonchus	Small	3	SS3	181	2	0.65	0.03	0.4	0.03	6	31	64.0875	400
2020	Sonchus	Small	3	SS3	238	0	0	0	0	0	NA	35	23	400
2020	Sonchus	Small	4	SS4	78	7	1.12	0.13	3.63	0.31	11	34	129.312	500
2020	Sonchus	Small	4	SS4	110	4	1.48	0.16	6.99	0.58	9	36	108.025	500
2020	Sonchus	Small	4	SS4	96	4	2.88	0.27	7.19	0.69	13	32	149.85	500
2020	Sonchus	Small	4	SS4	114	3	0.86	0.15	4.43	0.53	9	36	108.025	500
2020	Sonchus	Small	4	SS4	274	5	2.41	0.27	2.31	0.51	29	16	323.8	500
2020	Sonchus	Small	5	SS5	68	6	1.18	0.19	6.49	0.74	17	35	214.125	600
2020	Sonchus	Small	5	SS5	144	3	1.85	0.1	7.19	0.77	32	20	370.112	600
2020	Sonchus	Small	5	SS5	166	6	2.21	0.28	12.33	1.36	16	34	224.425	600
2020	Sonchus	Small	5	SS5	113	14	2.08	0.25	5.88	0.43	16	34	224.425	600
2020	Sonchus	Small	5	SS5	278	2	1.28	0.17	13.48	1.29	30	22	346.15	600
2020	Sonchus	Small	6	SS6	156	13	2.61	0.36	11.53	1.05	39	20	468.687	700
2020	Sonchus	Small	6	SS6	228	25	4.83	0.47	15.84	1.68	37	22	444.725	700
2020	Sonchus	Small	6	SS6	98	14	4.37	0.52	11.51	0.23	35	34	323	700
2020	Sonchus	Small	6	SS6	111	19	5.82	0.48	21.85	0.19	27	32	343.537	700
2020	Sonchus	Small	6	SS6	48	22	3.76	0.28	29.83	0.24	29	30	363.737	700
2020	Sonchus	Small	7	SS7	188	6	6.84	0.45	79.3	8.52	33	33	441.625	800
2020	Sonchus	Small	7	SS7	118	29	7.36	0.85	59.3	6.43	50	16	625.837	800
2020	Sonchus	Small	7	SS7	281	38	6.92	0.74	134.5	10.64	47	19	588.013	800
2020	Sonchus	Small	7	SS7	146	25	7.32	0.53	58.9	5.38	46	20	577.037	800
2020	Sonchus	Small	7	SS7	18	29	4.93	0.62	97.9	9.63	44	22	553.075	800
2020	Sonchus	Small	8	SS8	224	28	9.63	1.74	128.62	11.47	53	20	695.325	900
2020	Sonchus	Small	8	SS8	101	28	4.53	0.85	98.42	9.42	39	34	549.638	900
2020	Sonchus	Small	8	SS8	94	21	10.48	1.58	142.8	13.85	51	22	706.3	900
2020	Sonchus	Small	8	SS8	33	24	11.69	1.38	138.73	12.85	42	31	695.325	900
2020	Sonchus	Small	8	SS8	215	23	10.88	0.82	99.32	9.85	38	35	539.338	900
2020	Sonchus	Small	9	SS9	16	27	12.73	1.82	174.8	18.3	61	17	822.475	1000
2020	Sonchus	Small	9	SS9	90	35	9.75	1.85	107.3	11.6	58	20	787.7	1000
2020	Sonchus	Small	9	SS9	105	69	13.52	1.75	173.5	19.2	44	34	642.013	1000
2020	Sonchus	Small	9	SS9	267	19	10.53	0.45	185.7	12.8	57	21	776.213	1000
2020	Sonchus	Small	9	SS9	209	24	15.39	1.18	139.4	11.8	60	18	810.725	1000
2020	Sonchus	Small	10	SS10	132	23	25.4	2.58	248.1	24.3	55	28	802.662	1100
2020	Sonchus	Small	10	SS10	136	45	19.31	2.63	228.2	22.5	63	20	886.262	1100
2020	Sonchus	Small	10	SS10	125	27	10.69	1.93	178.8	13.8	48	35	730.275	1100
2020	Sonchus	Small	10	SS10	286	43	13.74	2.84	241	24.8	58	25	831.95	1100
2020	Sonchus	Small	10	SS10	5	33	11.87	0.68	268	22.7	47	36	719.287	1100
2020	Sonchus	Small	11	SS11	20	31	15.7	1.84	268.4	24.83	70	18	1010.46	1200
2020	Sonchus	Small	11	SS11	241	32	14.5	2.32	487.5	49.52	62	26	923.487	1200
2020	Sonchus	Small	11	SS11	135	25	10	0.9	187.2	17.43	66	22	963.475	1200
2020	Sonchus	Small	11	SS11	208	49	5.9	1.2	218.4	22.86	54	34	841.75	1200
2020	Sonchus	Small	11	SS11	86	35	14.5	1.49	262.7	26.96	69	19	998.412	1200
2020	Sonchus	Small	12	SS12	83	35	14.2	1.58	290.7	30.54	57	36	922.787	1300
2020	Sonchus	Small	12	SS12	163	58	19.6	1.74	662.5	69.32	70	23	1055.12	1300
2020	Sonchus	Small	12	SS12	100	60	8.2	0.94	468.5	40.62	74	19	1100.74	1300
2020	Sonchus	Small	12	SS12	248	61	46.2	4.39	432.3	43.89	62	31	974.862	1300
2020	Sonchus	Small	12	SS12	43	43	4.7	0.58	286.1	28.9	58	35	933.775	1300
2020	Cirsium	Large	1	CL1	147	0	0.42	0.065	0	0	NA	NA	NA	200
2020	Cirsium	Large	1	CL1	255	0	0.27	0.032	0	0	NA	NA	NA	200
2020	Cirsium	Large	1	CL1	45	0	0.34	0.054	0	0	NA	NA	NA	200
2020	Cirsium	Large	1	CL1	195	0	0.29	0.032	0	0	NA	NA	NA	200
2020	Cirsium	Large	1	CL1	112	0	0.38	0.058	0	0	NA	NA	NA	200
2020	Cirsium	Large	2	CL2	55	0	0.91	0.067	0.31	0.052	6	22	59.6375	300
2020	Cirsium	Large	2	CL2	79	0	0.77	0.089	0.26	0.036	6	22	59.6375	300
2020	Cirsium	Large	2	CL2	168	0	1.09	0.122	0	0	NA	NA	NA	300
2020	Cirsium	Large	2	CL2	201	0	0.33	0.092	0.21	0.019	6	22	59.6375	300
2020	Cirsium	Large	2	CL2	265	0	1.24	0.185	0.18	0.017	8	20	83.6	300
2020	Cirsium	Large	3	CL3	185	6	1.64	0.119	1.38	0.152	16	21	167.5	400
2020	Cirsium	Large	3	CL3	173	3	1.54	0.187	0.99	0.076	17	20	178.987	400
2020	Cirsium	Large	3	CL3	232	0	0.95	0.065	0.67	0.064	1	36	12.0125	400
2020	Cirsium	Large	3	CL3	13	0	1.45	0.169	0.68	0.073	5	32	53.8375	400
2020	Cirsium	Large	3	CL3	87	0	1.37	0.152	0	0	NA	NA	NA	400
2020	Cirsium	Large	4	CL4	152	5	1.69	0.139	2.99	0.13	15	22	251.037	500
2020	Cirsium	Large	4	CL4	129	5	1.44	0.135	3.57	0.37	17	28	191.4	500
2020	Cirsium	Large	4	CL4	84	5	2.02	0.253	2.76	0.36	5	32	149.85	500
2020	Cirsium	Large	4	CL4	207	8	2.18	0.206	4.97	0.52	27	18	298.025	500
2020	Cirsium	Large	4	CL4	279	8	1.43	0.167	4.16	0.49	14	31	160.1	500
2020	Cirsium	Large	5	CL5	219	15	1.95	0.199	19.34	2.55	25	27	296.812	600
2020	Cirsium	Large	5	CL5	149	10	2.33	0.242	18.88	1.64	32	20	370.112	600
2020	Cirsium	Large	5	CL5	4	3	1.61	1.01	6.99	0.59	19	33	234.7	600
2020	Cirsium	Large	5	CL5	143	4	1.97	0.187	6.89	0.51	22	30	265.162	600
2020	Cirsium	Large	5	CL5	217	4	1.64	0.163	8.3	0.82	19	33	234.7	600
2020	Cirsium	Large	6	CL6	164	8	1.15	0.198	13.39	1.42	35	31	353.788	700
2020	Cirsium	Large	6	CL6	243	8	2.5	0.211	7.56	0.79	34	32	343.537	700
2020	Cirsium	Large	6	CL6	38	10	1.96	0.187	16.43	1.93	35	31	353.788	700
2020	Cirsium	Large	6	CL6	196	11	1.76	0.233	13.89	1.4	30	36	301.712	700
2020	Cirsium	Large	6	CL6	145	7	2.13	0.2	7.23	0.71	44	22	444.725	700
2020	Cirsium	Large	7	CL7	178	13	3.98	0.328	37	2.96	47	26	513.087	800
2020	Cirsium	Large	7	CL7	41	11	3.35	0.299	13.1	1.29	51	22	553.075	800
2020	Cirsium	Large	7	CL7	189	11	2.45	0.233	52.1	5.05	48	25	522.725	800
2020	Cirsium	Large	7	CL7	120	12	2.99	0.304	20.3	2.22	42	31	462.138	800
2020	Cirsium	Large	7	CL7	290	9	2.83	0.265	13.1	1.19	40	33	441.625	800
2020	Cirsium	Large	8	CL8	27	26	6.99	0.563	65.62	6.04	48	30	590.375	900
2020	Cirsium	Large	8	CL8	191	16	6.54	0.548	60.91	4.12	42	36	528.35	900
2020	Cirsium	Large	8	CL8	203	40	6.45	0.5194	91.2	8.55	58	20	732.388	900
2020	Cirsium	Large	8	CL8	77	12	7.93	0.4954	38.27	3.32	42	36	528.35	900
2020	Cirsium	Large	8	CL8	242	12	5.89	0.672	45.5	4.09	44	34	549.638	900
2020	Cirsium	Large	9	CL9	251	20	6.78	0.728	69.04	6.32	51	32	662.55	1000
2020	Cirsium	Large	9	CL9	182	22	6.21	0.599	96.32	7.99	47	36	620.725	1000
2020	Cirsium	Large	9	CL9	54	60	7.56	0.783	233.87	25.32	52	31	672.8	1000
2020	Cirsium	Large	9	CL9	131	31	6.99	0.692	101.66	10.51	57	26	723.75	1000
2020	Cirsium	Large	9	CL9	216	50	7.16	0.703	119.31	9.96	48	35	631.713	1000
2020	Cirsium	Large	10	CL10	85	39	7.77	0.774	216.1	23.11	52	36	719.287	1100
2020	Cirsium	Large	10	CL10	169	29	7.73	0.689	87	7.77	53	35	730.275	1100
2020	Cirsium	Large	10	CL10	246	59	5.99	0.628	194.5	19.49	56	32	761.112	1100
2020	Cirsium	Large	10	CL10	177	24	6.12	0.635	68	5.82	58	30	781.312	1100
2020	Cirsium	Large	10	CL10	50	69	7.69	0.738	177.3	19.77	59	29	792.225	1100
2020	Cirsium	Large	11	CL11	155	88	6	0.671	154.9	16.98	66	27	914.14	1200
2020	Cirsium	Large	11	CL11	167	75	9.9	1.9	291.9	29.34	64	29	893.4	1200
2020	Cirsium	Large	11	CL11	116	70	5.6	0.536	146.6	14.06	55	38	796.44	1200
2020	Cirsium	Large	11	CL11	52	123	10.3	1.032	252.8	27.2	61	32	862.29	1200
2020	Cirsium	Large	11	CL11	270	59	10.4	1.011	238.8	24.67	75	19	998.41	1200
2020	Cirsium	Large	12	CL12	142	175	11.2	1.158	285.5	27.32	69	29	995.73	1300
2020	Cirsium	Large	12	CL12	34	38	8.5	0.919	138.9	12.89	66	32	964.61	1300
2020	Cirsium	Large	12	CL12	31	148	22.2	3.21	239.2	22.16	62	36	964.41	1300
2020	Cirsium	Large	12	CL12	253	111	9.1	0.765	198.3	17.34	62	36	922.79	1300
2020	Cirsium	Large	12	CL12	261	88	10.7	0.832	257.1	24.38	76	22	1065.8	1300
2020	Cirsium	Small	1	CS1	56	0	0.41	0.045	0	0	NA	NA	NA	200
2020	Cirsium	Small	1	CS1	97	0	0.36	0.04	0	0	NA	NA	NA	200
2020	Cirsium	Small	1	CS1	162	0	0.33	0.037	0	0	NA	NA	NA	200
2020	Cirsium	Small	1	CS1	239	0	0.27	0.033	0	0	NA	NA	NA	200
2020	Cirsium	Small	1	CS1	260	0	0.46	0.039	0	0	NA	NA	NA	200
2020	Cirsium	Small	2	CS2	12	0	0.96	0.107	0.31	0.052	10	18	106.63	300
2020	Cirsium	Small	2	CS2	93	0	0.76	0.082	0	0	NA	NA	NA	300
2020	Cirsium	Small	2	CS2	199	0	0.56	0.094	0	0	NA	NA	NA	300
2020	Cirsium	Small	2	CS2	249	0	0.33	0.032	0.11	0.016	6	22	59.64	300
2020	Cirsium	Small	2	CS2	257	0	0.55	0.049	0	0	NA	NA	NA	300
2020	Cirsium	Small	3	CS3	67	2	0.56	0.06	0.5	0.04	5	32	53.84	400
2020	Cirsium	Small	3	CS3	127	0	0.86	0.1075	0.09	0.01	7	30	74.04	400
2020	Cirsium	Small	3	CS3	218	0	1.58	0.1975	0.12	0.025	1	36	12.01	400
2020	Cirsium	Small	3	CS3	264	0	0.51	0.04375	0.08	0.04	7	22	155.03	400
2020	Cirsium	Small	3	CS3	277	0	0.46	0.0575	0.07	0.02	10	27	105.69	400
2020	Cirsium	Small	4	CS4	91	6	0.69	0.076	2.32	0.31	15	30	170.05	500
2020	Cirsium	Small	4	CS4	236	4	1.39	0.137	2.87	0.28	18	27	201.7	500
2020	Cirsium	Small	4	CS4	19	7	1.02	0.114	2.92	0.33	12	33	139.59	500
2020	Cirsium	Small	4	CS4	275	5	1.11	0.098	2.21	0.25	25	20	275	500
2020	Cirsium	Small	4	CS4	161	2	0.93	0.085	1.88	0.22	22	23	240.36	500
2020	Cirsium	Small	5	CS5	233	10	0.89	0.081	3.14	0.45	20	32	244.96	600
2020	Cirsium	Small	5	CS5	102	5	1.32	0.155	2.77	0.219	21	31	255.21	600
2020	Cirsium	Small	5	CS5	175	6	1.69	1.837	2.16	0.197	20	32	244.96	600
2020	Cirsium	Small	5	CS5	36	5	2.31	0.229	2.43	0.28	24	28	255.21	600
2020	Cirsium	Small	5	CS5	280	3	1.99	0.253	1.7	0.27	19	33	244.96	600
2020	Cirsium	Small	6	CS6	225	4	1.39	0.175	7.59	0.89	37	22	444.73	700
2020	Cirsium	Small	6	CS6	25	7	1.97	0.198	9.53	0.78	27	32	343.54	700
2020	Cirsium	Small	6	CS6	46	9	1.85	0.187	13.85	1.49	30	29	374.65	700
2020	Cirsium	Small	6	CS6	210	9	1.71	0.148	11.43	1.08	25	34	323	700
2020	Cirsium	Small	6	CS6	107	11	1.28	0.142	10	1.24	31	28	385.09	700
2020	Cirsium	Small	7	CS7	24	12	1.82	0.208	16.6	1.78	44	22	553.08	800
2020	Cirsium	Small	7	CS7	259	13	2.98	0.296	26.9	2.99	34	32	451.88	800
2020	Cirsium	Small	7	CS7	119	17	2.77	0.297	43.5	4.76	35	31	462.14	800
2020	Cirsium	Small	7	CS7	244	5	1.57	0.53	16	1.45	31	35	421.05	800
2020	Cirsium	Small	7	CS7	179	10	2.26	0.236	27	2.69	35	31	462.14	800
2020	Cirsium	Small	8	CS8	115	17	2.17	0.209	25.57	2.22	45	28	611.73	900
2020	Cirsium	Small	8	CS8	211	10	2.33	0.227	39.88	4.24	46	27	622.03	900
2020	Cirsium	Small	8	CS8	220	15	2.87	0.294	47.83	4.52	43	30	590.38	900
2020	Cirsium	Small	8	CS8	14	11	1.48	0.199	30.96	3.89	42	31	580.43	900
2020	Cirsium	Small	8	CS8	256	26	2.95	0.328	55.36	5.45	48	25	641.01	900
2020	Cirsium	Small	9	CS9	276	36	5.83	0.59	127.63	13.76	46	32	662.55	1000
2020	Cirsium	Small	9	CS9	250	21	5.45	0.553	116.24	12.11	46	32	662.55	1000
2020	Cirsium	Small	9	CS9	66	21	4.86	2.11	109.65	10.93	58	34	642.01	1000
2020	Cirsium	Small	9	CS9	140	15	4.99	0.494	97.48	8.95	50	28	704.1	1000
2020	Cirsium	Small	9	CS9	172	27	6.31	0	135.11	13.33	42	36	620.73	1000
2020	Cirsium	Small	10	CS10	92	112	6.77	0.686	345.3	32.87	50	33	750.85	1100
2020	Cirsium	Small	10	CS10	205	35	8.55	0.986	134.4	12.23	51	32	761.11	1100
2020	Cirsium	Small	10	CS10	282	24	5.99	0.604	115.9	13.96	66	17	921.04	1100
2020	Cirsium	Small	10	CS10	289	75	10.79	3	143.9	13.47	47	36	719.29	1100
2020	Cirsium	Small	10	CS10	58	62	13.3	1.188	137.4	14.66	51	32	761.11	1100
2020	Cirsium	Small	11	CS11	99	160	6.41	0.599	324.6	33.5	66	22	963.48	1200
2020	Cirsium	Small	11	CS11	187	108	10	1.5	189	19.5	52	36	820.46	1200
2020	Cirsium	Small	11	CS11	204	70	5.5	0.86	119.3	11.3	54	34	841.75	1200
2020	Cirsium	Small	11	CS11	64	91	10.6	1.62	174.1	16.8	54	34	841.75	1200
2020	Cirsium	Small	11	CS11	288	160	9.3	1.27	284.4	29.6	58	22	963.48	1200
2020	Cirsium	Small	12	CS12	39	103	13.5	1.58	203.9	21.5	73	34	944.08	1300
2020	Cirsium	Small	12	CS12	183	81	8.6	0.69	211.5	20.5	65	36	922.79	1300
2020	Cirsium	Small	12	CS12	269	157	12.8	1.17	266.8	41.8	63	22	1065.8	1300
2020	Cirsium	Small	12	CS12	272	99	8.8	0.95	165.8	14.5	62	32	964.61	1300
2020	Cirsium	Small	12	CS12	134	113	11.1	1.28	231	21.9	73	28	1006.2	1300
2021	Sonchus	Large	1	SL1	1	0	0.3	0.02	0	0	0	0	0	200
2021	Sonchus	Large	1	SL1	2	0	0.3	0.02	0	0	0	0	0	200
2021	Sonchus	Large	1	SL1	3	0	0.7	0.04	0	0	0	0	0	200
2021	Sonchus	Large	1	SL1	4	0	0.1	0.01	0	0	0	0	0	200
2021	Sonchus	Large	1	SL1	5	0	1.1	0.07	0	0	0	0	0	200
2021	Sonchus	Large	2	SL2	6	0	1	0.07	0.2	0.02	1	0	0	300
2021	Sonchus	Large	2	SL2	7	0	0.9	0.07	0.3	0.04	1	0	0	300
2021	Sonchus	Large	2	SL2	8	0	1.3	0.08	0.2	0.02	2	0	0	300
2021	Sonchus	Large	2	SL2	9	0	0.4	0.04	0	0	0	0	0	300
2021	Sonchus	Large	2	SL2	10	0	0.3	0.02	0	0	0	0	0	300
2021	Sonchus	Large	3	SL3	11	4	1.75	0.17	1.91	0.21	9	0	0	400
2021	Sonchus	Large	3	SL3	12	1	1.9	0.13	0.32	0.04	4	0	0	400
2021	Sonchus	Large	3	SL3	13	2	0.62	0.06	0.5	0.06	7	0	0	400
2021	Sonchus	Large	3	SL3	14	0	0.4	0.04	0	0	0	0	0	400
2021	Sonchus	Large	3	SL3	15	3	1.72	0.01	1.42	0.14	17	0	0	400
2021	Sonchus	Large	4	SL4	18	2	1.86	0.2178	0.5	0.0433	11	28	152.338	500
2021	Sonchus	Large	4	SL4	20	8	2.93	0.2265	4.36	0.4013	16	23	218.45	500
2021	Sonchus	Large	4	SL4	61	11	2.12	0.5699	14.47	1.2067	14	23	218.45	500
2021	Sonchus	Large	4	SL4	62	8	5.94	0.5207	19.97	1.3915	21	22	284.413	500
2021	Sonchus	Large	5	SL5	22	9	4.09	0.4761	28.9	2.6192	28	21	392.588	600
2021	Sonchus	Large	5	SL5	23	4	0.56	0.0594	0.9	0.11	15	30	215.738	600
2021	Sonchus	Large	5	SL5	24	9	7.18	0.6	38.48	3.2259	27	18	375.45	600
2021	Sonchus	Large	5	SL5	25	6	1.66	0.1677	4.32	0.3875	21	24	293.713	600
2021	Sonchus	Large	6	SL6	27	12	11.38	1.7607	99.35	6.6478	29	23	420.5	700
2021	Sonchus	Large	6	SL6	28	9	8.52	1.064	78.32	5.0068	27	23	420.5	700
2021	Sonchus	Large	6	SL6	29	9	3.09	0.4122	33.44	2.4042	26	23	420.5	700
2021	Sonchus	Large	6	SL6	30	8	4.25	0.4026	23.19	1.648	27	31	314.175	700
2021	Sonchus	Large	7	SL7	31	24	13.8	2.1851	128.26	10.29	35	23	420.5	800
2021	Sonchus	Large	7	SL7	32	15	6.46	1.0409	175.88	14.59	37	18	444.563	800
2021	Sonchus	Large	7	SL7	33	10	3.92	0.5109	30.2	2.83	30	28	354.388	800
2021	Sonchus	Large	7	SL7	34	16	9.44	1.5297	101.34	8.69	39	19	469.25	800
2021	Sonchus	Large	8	SL8	37	14	10.64	1.3459	80.71	7.25	33	30	530.44	900
2021	Sonchus	Large	8	SL8	38	22	14.31	2.719	227.32	17.13	30	33	492.63	900
2021	Sonchus	Large	8	SL8	39	18	30.23	5.6068	432.87	33.88	46	17	707.29	900
2021	Sonchus	Large	8	SL8	40	18	9.99	1.6992	166.52	13.51	40	23	624.19	900
2021	Sonchus	Large	9	SL9	64	19	11.05	1.8993	158.24	15.21	46	23	730.94	1000
2021	Sonchus	Large	9	SL9	45	24	11.18	1.2224	110.16	8.01	45	24	715.16	1000
2021	Sonchus	Large	9	SL9	69	38	27.46	4.323	339.73	27.75	42	17	830.24	1000
2021	Sonchus	Large	9	SL9	41	17	18.66	4.9725	351.46	37.42	36	33	599.38	1000
2021	Sonchus	Large	10	SL10	46	20	6.78	1.4032	118.56	7.75	45	33	689.4	1100
2021	Sonchus	Large	10	SL10	63	42	10.88	2.1365	262.51	24.64	49	24	792.43	1100
2021	Sonchus	Large	10	SL10	66	43	14.97	3.832	345.34	33.87	50	23	808.2	1100
2021	Sonchus	Large	10	SL10	67	35	19.19	3.8413	247.48	30.64	40	33	689.4	1100
2021	Sonchus	Large	11	SL11	50	16	8.91	1.3053	167.71	13.09	49	24	904.66	1200
2021	Sonchus	Large	11	SL11	54	16	14.99	3.7093	336.15	44.95	49	24	904.66	1200
2021	Sonchus	Large	11	SL11	70	35	10.94	3.1654	255.8	39.43	43	30	810.91	1200
2021	Sonchus	Large	11	SL11	75	28	21.64	4.4257	283.19	32.16	51	32	798.34	1200
2021	Sonchus	Large	12	SL12	58	32	26.8	7.9663	442.75	69.6	49	24	998.23	1300
2021	Sonchus	Large	12	SL12	56	24	14	4.057	422.77	72.52	49	27	961.175	1300
2021	Sonchus	Large	12	SL12	60	18	14.17	3.9152	184.67	22.11	52	31	907.68	1300
2021	Sonchus	Large	12	SL12	65	26	24.36	7.3356	437.66	62.25	51	32	895.2	1300
2021	Sonchus	Small	1	SS1	76	0	0	0	0	0	NA	NA	NA	200
2021	Sonchus	Small	1	SS1	77	0	0.3	0.024	0	0	NA	NA	NA	200
2021	Sonchus	Small	1	SS1	78	0	0	0	0	0	NA	NA	NA	200
2021	Sonchus	Small	1	SS1	79	0	0.9	0.057	0	0	NA	NA	NA	200
2021	Sonchus	Small	1	SS1	80	0	0.6	0.035	0	0	NA	NA	NA	200
2021	Sonchus	Small	2	SS2	81	0	0	0	0	0	NA	NA	NA	300
2021	Sonchus	Small	2	SS2	82	0	1.3	0.05	0.2	0.01	2	0	0	300
2021	Sonchus	Small	2	SS2	83	3	1.3	0.06	1.2	0.07	2	0	0	300
2021	Sonchus	Small	2	SS2	84	1	0.8	0.03	0.4	0.02	6	0	0	300
2021	Sonchus	Small	2	SS2	85	0	0.5	0.03	0.3	0.01	2	0	0	300
2021	Sonchus	Small	3	SS3	86	0	0.09	0.01	0	0	NA	NA	NA	400
2021	Sonchus	Small	3	SS3	87	5	0.87	0.12	5.44	0.39	15	0	0	400
2021	Sonchus	Small	3	SS3	88	2	1.02	0.07	0.6	0.05	9	0	0	400
2021	Sonchus	Small	3	SS3	89	4	1.06	0.01	2.85	0.21	8	0	0	400
2021	Sonchus	Small	3	SS3	90	4	0.89	0.38	1.5	0.13	13	0	0	400
2021	Sonchus	Small	4	SS4	91	6	3.5	0.3506	13.98	1.037	22	17	317.75	500
2021	Sonchus	Small	4	SS4	92	3	0.63	0.0679	1.69	0.122	19	18	255.18	500
2021	Sonchus	Small	4	SS4	93	5	4.29	0.3723	19.2	1.521	21	20	284.41	500
2021	Sonchus	Small	4	SS4	94	4	0.85	0.1314	2.8	0.2156	17	22	230.21	500
2021	Sonchus	Small	4	SS4	95	5	0.39	0.0238	0.01	0.0033	15	24	202.68	500
2021	Sonchus	Small	5	SS5	141	7	2.09	0.1915	9.66	0.923	26	19	358.24	600
2021	Sonchus	Small	5	SS5	97	9	4.79	0.5143	42.67	4.559	28	21	392.587	600
2021	Sonchus	Small	5	SS5	98	9	4.62	0.4	20.52	1.6639	21	24	293.713	600
2021	Sonchus	Small	5	SS5	99	13	8.19	0.831	39.01	3.3225	31	14	446.08	600
2021	Sonchus	Small	5	SS5	100	7	2.04	0.2541	13.84	1.242	27	18	375.45	600
2021	Sonchus	Small	6	SS6	101	13	6.56	0.652	90.62	6.25	34	19	469.25	700
2021	Sonchus	Small	6	SS6	143	20	11.89	1.0344	96.12	7.9758	33	19	469.25	700
2021	Sonchus	Small	6	SS6	142	8	2.01	0.2843	19.05	1.6235	34	23	420.5	700
2021	Sonchus	Small	6	SS6	104	7	2.56	1.2167	22.06	5.6505	26	30	326.75	700
2021	Sonchus	Small	6	SS6	105	24	7.72	0.3022	104.45	1.2367	37	21	503.6	700
2021	Sonchus	Small	7	SS7	106	24	8.47	1.0368	113.24	8.14	30	28	462.21	800
2021	Sonchus	Small	7	SS7	107	6	0.91	0.1147	17.82	0.3708	35	23	540.088	800
2021	Sonchus	Small	7	SS7	108	39	13.98	2.1197	161.15	10.96	34	22	512.55	800
2021	Sonchus	Small	7	SS7	109	15	5.14	0.7394	0.7394	7.68	34	22	512.55	800
2021	Sonchus	Small	7	SS7	110	8	2.09	0.1708	9.96	0.7204	34	22	512.55	800
2021	Sonchus	Small	8	SS8	111	38	4.88	0.6653	139.95	10.25	40	23	624.19	900
2021	Sonchus	Small	8	SS8	112	19	5.99	0.8506	79.1	5.88	40	23	624.19	900
2021	Sonchus	Small	8	SS8	113	32	17.91	2.232	173.03	11.91	40	23	624.19	900
2021	Sonchus	Small	8	SS8	114	29	7.67	0.8978	157.02	11.6	39	24	608.41	900
2021	Sonchus	Small	8	SS8	115	13	3.44	0.5208	46.61	4.12	34	29	544.93	900
2021	Sonchus	Small	9	SS9	116	14	7.22	0.6787	110.99	9.54	35	34	586.54	1000
2021	Sonchus	Small	9	SS9	117	32	26.06	4.7536	418.16	27.71	50	19	779.65	1000
2021	Sonchus	Small	9	SS9	118	32	5.5	0.9878	163.33	11.67	46	23	730.938	1000
2021	Sonchus	Small	9	SS9	119	28	16.23	2.9311	259.61	20.49	46	23	730.938	1000
2021	Sonchus	Small	9	SS9	120	12	1.14	0.1486	22.83	1.57	35	34	586.54	1000
2021	Sonchus	Small	10	SS10	121	38	9.61	1.6157	224.51	20.43	43	30	714.45	1100
2021	Sonchus	Small	10	SS10	124	49	7.46	1.8669	349.44	37.01	39	34	663.8	1100
2021	Sonchus	Small	10	SS10	136	52	11.79	3.1452	336.42	41.36	58	15	919.04	1100
2021	Sonchus	Small	10	SS10	138	26	19.18	5.1558	249.81	28.8	54	19	875.93	1100
2021	Sonchus	Small	10	SS10	125	12	1.84	0.199	25.07	1.72	39	34	663.8	1100
2021	Sonchus	Small	11	SS11	126	20	6.44	1.1245	185.68	19.38	45	33	773.1	1200
2021	Sonchus	Small	11	SS11	127	30	24.61	5.9042	445.12	53.54	54	24	888.89	1200
2021	Sonchus	Small	11	SS11	128	31	17.15	4.1569	392.37	54.67	59	19	953.41	1200
2021	Sonchus	Small	11	SS11	129	44	24.27	3.335	357.32	48.34	54	24	888.89	1200
2021	Sonchus	Small	11	SS11	130	32	16.3	4.5675	365.26	50.08	55	23	904.66	1200
2021	Sonchus	Small	12	SS12	148	22	12.95	2.2047	167.72	14.1	65	18	970.63	1300
2021	Sonchus	Small	12	SS12	132	26	12.65	3.9286	392.53	50.92	60	23	1014	1300
2021	Sonchus	Small	12	SS12	133	32	12	3.9413	406.31	61.19	60	23	1014	1300
2021	Sonchus	Small	12	SS12	149	38	7.85	2.6842	225.81	36.45	60	23	1014	1300
2021	Sonchus	Small	12	SS12	135	29	17.13	4.4753	300.49	40.67	50	33	882.44	1300
2021	Cirsium	Large	1	CL1	151	0	2.4	0.177	0	0	NA	NA	NA	200
2021	Cirsium	Large	1	CL1	152	0	1	0.06	0	0	NA	NA	NA	200
2021	Cirsium	Large	1	CL1	153	0	1.8	0.112	0	0	NA	NA	NA	200
2021	Cirsium	Large	1	CL1	154	0	1.2	0.128	0	0	NA	NA	NA	200
2021	Cirsium	Large	1	CL1	155	0	0.8	0.046	0	0	NA	NA	NA	200
2021	Cirsium	Large	2	CL2	156	3	1.7	0.11	1.7	0.16	11	14	150.49	300
2021	Cirsium	Large	2	CL2	157	0	1.5	0.08	0.2	0.03	1	22	12.125	300
2021	Cirsium	Large	2	CL2	158	1	2	0.12	1.2	0.12	6	19	76.65	300
2021	Cirsium	Large	2	CL2	159	0	1.9	0.1	0.3	0.04	2	23	27.9	300
2021	Cirsium	Large	2	CL2	160	0	2.1	0.17	0.2	0.03	1	24	12.125	300
2021	Cirsium	Large	3	CL3	161	4	1.3993	0.15	5.58	0.45	15	21	201.9	400
2021	Cirsium	Large	3	CL3	162	7	2.22	0.16	4.3	0.29	9	23	118.8	400
2021	Cirsium	Large	3	CL3	163	6	2.05	0.16	6.45	0.6	14	20	184.76	400
2021	Cirsium	Large	3	CL3	164	5	2.69	0.09	3.32	0.45	9	23	118.8	400
2021	Cirsium	Large	3	CL3	165	3	1.04	0.07	1.57	0.17	9	23	118.8	400
2021	Cirsium	Large	4	CL4	166	6	1.31	0.994	8.25	0.6858	15	24	202.68	500
2021	Cirsium	Large	4	CL4	167	8	1.82	0.1314	11.17	0.99	20	19	267.2	500
2021	Cirsium	Large	4	CL4	168	12	2.73	0.2037	24.12	2.2848	22	17	301.55	500
2021	Cirsium	Large	4	CL4	169	12	2.7	0.2041	17.66	1.6963	21	18	284.41	500
2021	Cirsium	Large	4	CL4	170	11	3	0.3245	24.15	2.0572	14	23	218.45	500
2021	Cirsium	Large	5	CL5	171	10	2.87	0.2025	12.8	1.3064	26	19	358.24	600
2021	Cirsium	Large	5	CL5	172	12	2.9	0.2326	28.77	2.6129	22	23	309.49	600
2021	Cirsium	Large	5	CL5	173	15	3.5	0.3098	46.26	4.0161	28	17	392.59	600
2021	Cirsium	Large	5	CL5	174	10	4.3	0.3184	31.24	2.6492	22	23	309.49	600
2021	Cirsium	Large	5	CL5	175	12	2.51	0.2657	18.19	1.7862	26	19	358.24	600
2021	Cirsium	Large	6	CL6	176	14	1.92	0.163	19.73	1.8871	28	22	404.725	700
2021	Cirsium	Large	6	CL6	177	17	5.7	0.5472	91.24	7.1272	34	18	486.462	700
2021	Cirsium	Large	6	CL6	178	12	4.05	0.3081	32.87	2.9377	29	23	420.5	700
2021	Cirsium	Large	6	CL6	179	8	4.67	0.4538	68.71	5.415	29	23	420.5	700
2021	Cirsium	Large	6	CL6	180	10	1.61	0.1228	10.02	1.231	29	23	420.5	700
2021	Cirsium	Large	7	CL7	181	17	5.2	0.6882	93.07	8.94	35	23	528.325	800
2021	Cirsium	Large	7	CL7	182	11	3.36	0.3629	56.91	4.6404	35	23	528.325	800
2021	Cirsium	Large	7	CL7	183	13	3.68	0.4119	61.15	6.44	35	23	528.325	800
2021	Cirsium	Large	7	CL7	184	18	3.89	0.4506	81.94	6.91	35	23	528.325	800
2021	Cirsium	Large	7	CL7	185	11	4.12	0.5778	126.83	12.08	34	22	512.55	800
2021	Cirsium	Large	8	CL8	186	27	5.97	0.9906	94.48	8.48	30	33	492.63	900
2021	Cirsium	Large	8	CL8	187	38	6.72	1.2243	197.78	23.05	40	23	624.188	900
2021	Cirsium	Large	8	CL8	188	26	5.48	1.0841	127.87	14.14	44	19	672.94	900
2021	Cirsium	Large	8	CL8	189	19	5.43	0.7871	106.71	9.86	24	24	608.413	900
2021	Cirsium	Large	8	CL8	190	30	5.35	0.9654	142.36	16.32	44	19	672.94	900
2021	Cirsium	Large	9	CL9	191	28	8.21	1.7583	186.58	20.11	46	23	730.938	1000
2021	Cirsium	Large	9	CL9	192	28	4.29	0.9725	135.92	17.03	46	23	730.938	1000
2021	Cirsium	Large	9	CL9	193	43	4.86	1.2058	182.89	21.73	52	17	814.038	1000
2021	Cirsium	Large	9	CL9	194	30	7.54	1.99	262.78	31.6	41	19	779.69	1000
2021	Cirsium	Large	9	CL9	195	30	7.99	1.9	229.05	28.54	46	23	730.938	1000
2021	Cirsium	Large	10	CL10	196	24	9.51	2.811	198.76	30.11	55	18	874.16	1100
2021	Cirsium	Large	10	CL10	197	28	5.27	1.2937	151.8	19.99	54	19	875.925	1100
2021	Cirsium	Large	10	CL10	198	31	7.64	1.9368	192.86	27.41	50	23	827.18	1100
2021	Cirsium	Large	10	CL10	199	36	8.92	2.2252	252.45	34.63	49	24	792.43	1100
2021	Cirsium	Large	10	CL10	200	24	10.01	2.8048	241.38	38.52	50	23	827.18	1100
2021	Cirsium	Large	11	CL11	201	49	6.67	2.2952	249.54	48.24	59	19	953.413	1200
2021	Cirsium	Large	11	CL11	202	32	4.62	1.4988	174.16	57.9	59	19	953.413	1200
2021	Cirsium	Large	11	CL11	203	51	7.28	2.3501	308.64	30.67	60	18	970.63	1200
2021	Cirsium	Large	11	CL11	204	27	10.33	3.054	304.86	58.52	55	23	904.663	1200
2021	Cirsium	Large	11	CL11	205	34	14.43	4.787	323.78	52.85	59	19	953.413	1200
2021	Cirsium	Large	12	CL12	206	38	9.16	3.3028	230.63	65.81	60	23	1014	1300
2021	Cirsium	Large	12	CL12	207	28	11.24	3.8772	311.89	65.21	64	19	1062.75	1300
2021	Cirsium	Large	12	CL12	208	45	10.52	3.5783	422.47	84.05	64	19	1062.75	1300
2021	Cirsium	Large	12	CL12	209	32	4.51	1.7475	227.11	46.51	66	17	1097.1	1300
2021	Cirsium	Large	12	CL12	210	22	8.01	3.0733	268.01	53.61	64	19	1062.75	1300
2021	Cirsium	Large	13	CL13	215	34	9.92	3.1557	302.26	70.1	65	23	1114.15	1400
2021	Cirsium	Large	13	CL13	216	30	8.29	2.8567	278.43	63.68	65	23	1114.15	1400
2021	Cirsium	Large	13	CL13	217	32	5.16	1.5694	239.42	49.04	69	19	1162.9	1400
2021	Cirsium	Large	13	CL13	218	26	5.54	1.9874	264.51	62.21	65	23	1114.15	1400
2021	Cirsium	Large	13	CL13	220	23	8.17	2.7597	246.82	51.18	71	17	1197.3	1400
2021	Cirsium	Small	1	CS1	226	0	0.5	0.04	0	0	0	0	0	200
2021	Cirsium	Small	1	CS1	227	0	1.1	0.07	0	0	0	0	0	200
2021	Cirsium	Small	1	CS1	228	0	1	0.06	0	0	0	0	0	200
2021	Cirsium	Small	1	CS1	229	0	1.3	0.1	0	0	0	0	0	200
2021	Cirsium	Small	1	CS1	230	0	0.6	0.03	0	0	0	0	0	200
2021	Cirsium	Small	2	CS2	231	0	1	0.05	0.6	0.04	6	19	76.65	300
2021	Cirsium	Small	2	CS2	232	1	1.7	0.13	1.4	0.05	7	18	93.8625	300
2021	Cirsium	Small	2	CS2	233	0	2	0.08	0.8	0.07	7	18	93.8625	300
2021	Cirsium	Small	2	CS2	234	0	1.1	0.06	0.5	0.11	1	22	12.125	300
2021	Cirsium	Small	2	CS2	235	0	1.6	0.09	0.3	0.02	2	23	27.9	300
2021	Cirsium	Small	3	CS3	236	4	0.99	0.05	0.05	0.12	18	14	241.387	400
2021	Cirsium	Small	3	CS3	237	2	1.44	0.08	2.41	0.19	9	23	118.8	400
2021	Cirsium	Small	3	CS3	238	2	0.77	0.04	1.36	0.1	9	23	118.8	400
2021	Cirsium	Small	3	CS3	239	1	1.02	0.09	0.53	0.06	9	23	118.8	400
2021	Cirsium	Small	3	CS3	240	4	1.27	0.09	1.93	0.24	10	24	103.025	400
2021	Cirsium	Small	4	CS4	241	8	0.94	0.0696	6.1	0.5474	20	19	267.2	500
2021	Cirsium	Small	4	CS4	242	7	1.18	0.0824	6.24	0.5699	16	23	218.45	500
2021	Cirsium	Small	4	CS4	243	2	1.13	0.0678	3.7	0.2791	8	31	112.125	500
2021	Cirsium	Small	4	CS4	244	6	1.11	0.0793	4.1	0.4415	20	19	267.2	500
2021	Cirsium	Small	4	CS4	245	7	1.48	0.1359	11.94	1.0853	20	19	267.2	500
2021	Cirsium	Small	5	CS5	246	12	3.91	0.3	39.03	3.5165	28	21	392.587	600
2021	Cirsium	Small	5	CS5	247	8	1.89	0.1333	12.63	1.1749	21	24	293.713	600
2021	Cirsium	Small	5	CS5	248	10	2.06	0.1678	14.56	1.4701	20	23	309.488	600
2021	Cirsium	Small	5	CS5	249	10	2.01	0.1645	22.45	1.9826	20	23	309.488	600
2021	Cirsium	Small	5	CS5	250	7	0.71	0.04567	6.26	0.5568	19	22	321.25	600
2021	Cirsium	Small	6	CS6	251	13	2.29	0.2176	36.04	2.665	30	22	432.262	700
2021	Cirsium	Small	6	CS6	252	14	1.62	0.1791	27.57	2.473	34	18	486.462	700
2021	Cirsium	Small	6	CS6	253	11	4.31	0.3731	60.82	6.189	29	23	420.5	700
2021	Cirsium	Small	6	CS6	254	12	4.38	0.4139	62.36	5.0122	33	19	469.25	700
2021	Cirsium	Small	6	CS6	255	11	1.88	0.1228	13.96	1.3468	28	24	404.725	700
2021	Cirsium	Small	7	CS7	256	13	6.42	0.6555	107.57	9.45	34	24	512.55	800
2021	Cirsium	Small	7	CS7	257	15	3.09	0.3052	134.54	13.28	35	23	528.325	800
2021	Cirsium	Small	7	CS7	258	11	6.34	0.7708	109.34	10.49	35	23	528.325	800
2021	Cirsium	Small	7	CS7	259	15	4.22	0.7112	39.16	4.32	35	23	528.325	800
2021	Cirsium	Small	7	CS7	260	15	2.27	0.2065	31.74	3.98	35	23	528.325	800
2021	Cirsium	Small	8	CS8	261	26	3.83	0.8442	125.16	13.25	46	17	707.288	900
2021	Cirsium	Small	8	CS8	262	28	5.88	1.0432	130.3	15.83	39	24	608.413	900
2021	Cirsium	Small	8	CS8	263	21	6.9	1.2624	194.85	19.05	39	24	608.413	900
2021	Cirsium	Small	8	CS8	264	28	5.07	1.0867	169.35	18.5	46	17	707.288	900
2021	Cirsium	Small	8	CS8	265	42	5.53	1.3632	191.45	22.65	39	24	608.413	900
2021	Cirsium	Small	9	CS9	266	35	7.25	1.6258	207.78	20.57	45	24	715.163	1000
2021	Cirsium	Small	9	CS9	267	44	6.67	1.3154	243.24	20.44	52	17	814.038	1000
2021	Cirsium	Small	9	CS9	268	43	6.27	1.3105	247.85	28.38	54	15	841.775	1000
2021	Cirsium	Small	9	CS9	269	36	7.51	1.457	241.96	27.04	52	17	814.038	1000
2021	Cirsium	Small	9	CS9	270	26	5.5	1.079	148.71	14.11	44	23	730.938	1000
2021	Cirsium	Small	10	CS10	271	24	8.33	2.4078	266.18	39.08	54	19	875.925	1100
2021	Cirsium	Small	10	CS10	272	25	5.46	1.4525	202.56	29.43	54	19	875.925	1100
2021	Cirsium	Small	10	CS10	273	30	8.59	2.3676	312.18	44.64	50	23	827.175	1100
2021	Cirsium	Small	10	CS10	274	24	8.21	4.1339	290.69	34.81	50	23	827.175	1100
2021	Cirsium	Small	10	CS10	275	26	6.14	3.5675	221.98	30.87	54	19	875.925	1100
2021	Cirsium	Small	11	CS11	276	31	4.4	0.9885	137.15	17.35	55	23	904.663	1200
2021	Cirsium	Small	11	CS11	277	29	7.05	2.2327	224.87	41.32	61	17	1003.96	1200
2021	Cirsium	Small	11	CS11	278	27	10.14	2.8616	316.26	63.38	59	19	953.413	1200
2021	Cirsium	Small	11	CS11	280	31	10.29	3.2327	297.83	58.6	55	23	904.663	1200
2021	Cirsium	Small	11	CS11	298	24	5.77	1.432	182.03	25.86	59	19	953.413	1200
2021	Cirsium	Small	12	CS12	281	22	3.05	1.3899	151.13	28.24	60	23	1014	1300
2021	Cirsium	Small	12	CS12	282	34	5.38	2.2405	234.04	51.22	64	19	1062.75	1300
2021	Cirsium	Small	12	CS12	283	32	7.26	2.5232	208.34	38.21	60	23	1014	1300
2021	Cirsium	Small	12	CS12	292	26	5.23	2.0805	93.65	37.98	60	23	1014	1300
2021	Cirsium	Small	12	CS12	285	29	5.12	2.0653	283.79	57.52	60	23	1014	1300
2021	Cirsium	Small	13	CS13	295	28	8.11	2.0135	195.63	45.94	65	23	1114.15	1400
2021	Cirsium	Small	13	CS13	300	29	5.53	2.5005	225.25	49.94	64	24	1098.38	1400
2021	Cirsium	Small	13	CS13	287	20	7.13	1.975	190.45	41.41	74	14	1236.74	1400
2021	Cirsium	Small	13	CS13	290	31	5.64	1.8374	250.4	55.24	65	23	1114.15	1400
2021	Cirsium	Small	13	CS13	289	27	7.85	2.1102	242.96	49.56	74	14	1236.74	1400

## Sheet: Carb_Data
Year	Species	Root.Size	Assessment	GDD	Root.Weight	WSCH
2020	Cirsium	Large	0	0	NA	NA
2020	Cirsium	Large	1	200	6.49	445.313
2020	Cirsium	Large	2	300	5.33	376.521
2020	Cirsium	Large	3	400	4.58	264.478
2020	Cirsium	Large	4	500	3.639	206.409
2020	Cirsium	Large	5	600	4.91	270.857
2020	Cirsium	Large	6	700	5.068	313.373
2020	Cirsium	Large	7	800	5.679	190.955
2020	Cirsium	Large	8	900	7.96	230.449
2020	Cirsium	Large	9	1000	10.35	115.855
2020	Cirsium	Large	10	1100	9.82	211.875
2020	Cirsium	Large	11	1200	12.8801	219.362
2020	Cirsium	Large	12	1300	17.2848	244.316
2020	Cirsium	Large	13	NA	NA	NA
2020	Cirsium	Small	0	0	NA	NA
2020	Cirsium	Small	1	200	2.724	425.973
2020	Cirsium	Small	2	300	2.3144	445.301
2020	Cirsium	Small	3	400	2.2168	373.382
2020	Cirsium	Small	4	500	1.815	219.535
2020	Cirsium	Small	5	600	1.8	200.985
2020	Cirsium	Small	6	700	2.109	283.577
2020	Cirsium	Small	7	800	2.13	137.428
2020	Cirsium	Small	8	900	3.17	201.869
2020	Cirsium	Small	9	1000	7.77	179.978
2020	Cirsium	Small	10	1100	12.43	253.009
2020	Cirsium	Small	11	1200	11.17	240.227
2020	Cirsium	Small	12	1300	16.9356	278.423
2020	Cirsium	Small	13	NA	NA	NA
2020	Sonchus	Large	0	0	NA	NA
2020	Sonchus	Large	1	200	5.855	546.086
2020	Sonchus	Large	2	300	5.53	585.076
2020	Sonchus	Large	3	400	4.295	499.096
2020	Sonchus	Large	4	500	4.709	499.636
2020	Sonchus	Large	5	600	8.018	487.801
2020	Sonchus	Large	6	700	10.576	556.314
2020	Sonchus	Large	7	800	15.66	839.58
2020	Sonchus	Large	8	900	23.24	842.62
2020	Sonchus	Large	9	1000	28.51	892.723
2020	Sonchus	Large	10	1100	26.29	851.83
2020	Sonchus	Large	11	1200	29.738	895.455
2020	Sonchus	Large	12	1300	40.32	945.563
2020	Sonchus	Large	13	NA	NA	NA
2020	Sonchus	Small	0	0	NA	NA
2020	Sonchus	Small	1	200	3.226	575.372
2020	Sonchus	Small	2	300	2.865	576.049
2020	Sonchus	Small	3	400	3.081	550.878
2020	Sonchus	Small	4	500	2.636	521.053
2020	Sonchus	Small	5	600	2.363	510.579
2020	Sonchus	Small	6	700	3.96	522.834
2020	Sonchus	Small	7	800	7.4	607.929
2020	Sonchus	Small	8	900	6.92	532.567
2020	Sonchus	Small	9	1000	13.57	811.909
2020	Sonchus	Small	10	1100	20.22	873.433
2020	Sonchus	Small	11	1200	31.217	932.159
2020	Sonchus	Small	12	1300	44.1146	916.183
2020	Sonchus	Small	13	NA	NA	NA
2021	Cirsium	Large	0	0	6.7308	794.91
2021	Cirsium	Large	1	200	6.7705	343.428
2021	Cirsium	Large	2	300	5.921	368.805
2021	Cirsium	Large	3	400	4.438	160.068
2021	Cirsium	Large	4	500	5.022	104.361
2021	Cirsium	Large	5	600	5.539	120.86
2021	Cirsium	Large	6	700	6.1	102.083
2021	Cirsium	Large	7	800	7.376	120.561
2021	Cirsium	Large	8	900	9.332	136.754
2021	Cirsium	Large	9	1000	14.53	207.997
2021	Cirsium	Large	10	1100	18.93	280.996
2021	Cirsium	Large	11	1200	25.58	266.77
2021	Cirsium	Large	12	1300	35.1	301.965
2021	Cirsium	Large	13	NA	35.3	240.396
2021	Cirsium	Small	0	0	3.3654	794.91
2021	Cirsium	Small	1	200	3.17	286.125
2021	Cirsium	Small	2	300	2.362	271.64
2021	Cirsium	Small	3	400	2.219	229.591
2021	Cirsium	Small	4	500	2.192	140.814
2021	Cirsium	Small	5	600	3.312	107.112
2021	Cirsium	Small	6	700	4.097	119.16
2021	Cirsium	Small	7	800	5.921	172.107
2021	Cirsium	Small	8	900	10.595	226.384
2021	Cirsium	Small	9	1000	10.01	244.684
2021	Cirsium	Small	10	1100	18.97	295.206
2021	Cirsium	Small	11	1200	14.47	262.158
2021	Cirsium	Small	12	1300	25.82	274.66
2021	Cirsium	Small	13	NA	19.25	276.755
2021	Sonchus	Large	0	0	8.8871	887.752
2021	Sonchus	Large	1	200	7.574	829.519
2021	Sonchus	Large	2	300	7.727	716.372
2021	Sonchus	Large	3	400	7.878	552.197
2021	Sonchus	Large	4	500	5.355	588.085
2021	Sonchus	Large	5	600	6.392	667.842
2021	Sonchus	Large	6	700	8.117	657.526
2021	Sonchus	Large	7	800	9.955	655.688
2021	Sonchus	Large	8	900	14.682	689.062
2021	Sonchus	Large	9	1000	18.83	774.152
2021	Sonchus	Large	10	1100	28.63	773.773
2021	Sonchus	Large	11	1200	25.06	837.358
2021	Sonchus	Large	12	1300	33.54	770.199
2021	Sonchus	Large	13	NA	NA	NA
2021	Sonchus	Small	0	0	4.44355	887.752
2021	Sonchus	Small	1	200	4.07	441.386
2021	Sonchus	Small	2	300	3.784	512.022
2021	Sonchus	Small	3	400	3.15	514.875
2021	Sonchus	Small	4	500	3.34	511.191
2021	Sonchus	Small	5	600	3.69	563.182
2021	Sonchus	Small	6	700	6.72	558.949
2021	Sonchus	Small	7	800	6.53	639.828
2021	Sonchus	Small	8	900	8.47	638.197
2021	Sonchus	Small	9	1000	8.57	600.246
2021	Sonchus	Small	10	1100	29.9	803.031
2021	Sonchus	Small	11	1200	28.64	757.793
2021	Sonchus	Small	12	1300	45.28	825.269
2021	Sonchus	Small	13	NA	NA	NA

## Sheet: Abbrev
Root.Size	Cirsium: L=Large (Ø=4-5mm, 5-5.5g), S=Small (Ø=4-5mm, 2.5-3g), Sonchus: L=Large (Ø=5-6mm, 5-6g), S=Small (Ø=5-6mm, 2.5-3g)
Assessment	1=200GDD,2=300GGD…
Group	1. Buchstabe, S=Sonchus, C=Cirsium 2.Buchstabe, L=Large, S=Small
Bground(FM)	Frischmasse unterirdischer Sprossteil
Bground(TM)	Trockenmasse unterirdischer Sprossteil
Aground(FM)	Frischmasse oberirdischer Sprossteil
Aground(TM)	Trockenmasse oberirdischer Sprossteil
leaves.total	Anzahl Blätter aller Sprosse einer Pflanze
leaves	Anzahl Blätter des am weitesten entwickelten Sprosses einer Pflanze
Shoots	Anzahl oberirdischer Sprosse
Height	Sprosshöhe (Höchster Spross, weitere Sprosse einer Pflanze nicht beruecksichtigt)
DAE	Days after emergence
DTE	Day till emergence
GDDAE	Growing degree days after emergence; Bis zum Zeitpunkt der Bonitur
GDD	Growing degree days (Methode nach Donald; siehe Material und Methoden)
